# Supplementary material
Source: MDPI journal article supplement (https://www.mdpi.com/2073-4344/14/3/172)
Supplement: s1 [file s1]

Supporting Information

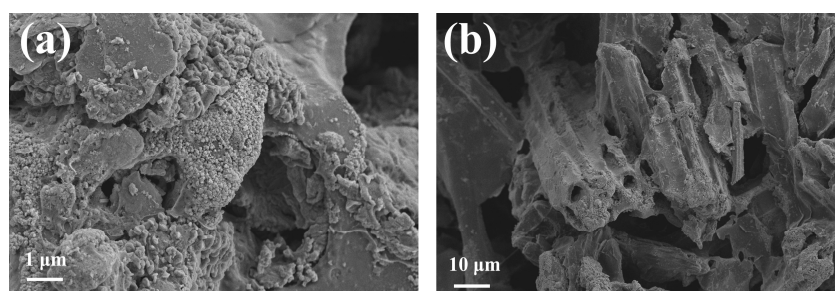

**Figure S1.** SEM image of Cu/C-BN material

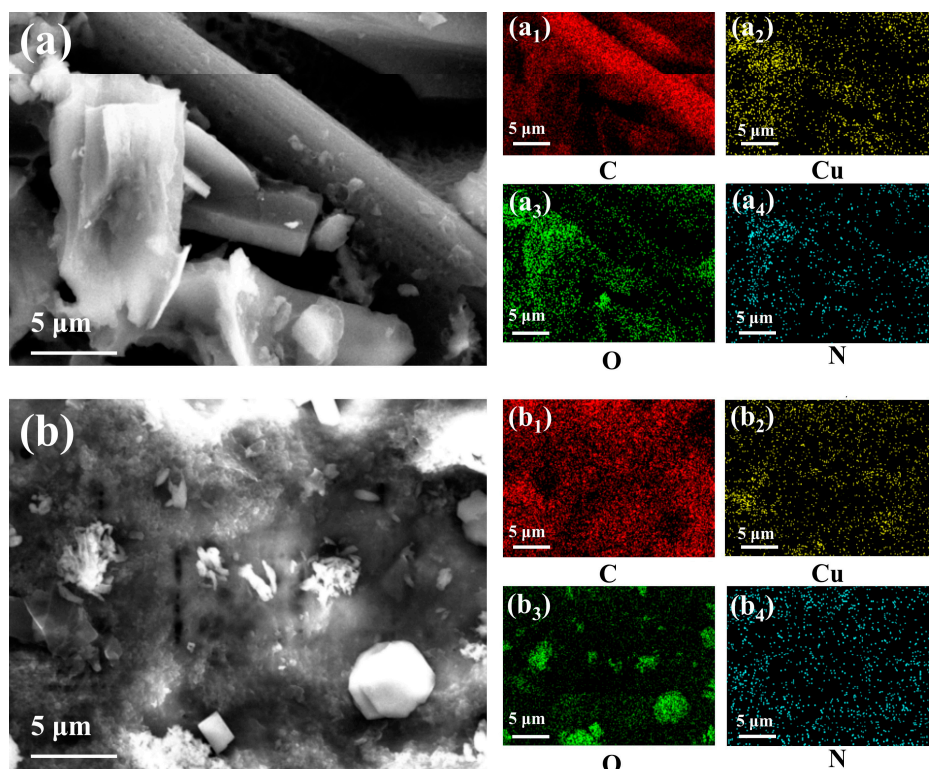

**Figure S2.** EDS-elements mapping of Cu/C-BN-CC(a) and Cu/C-BN-PT(b) materials.

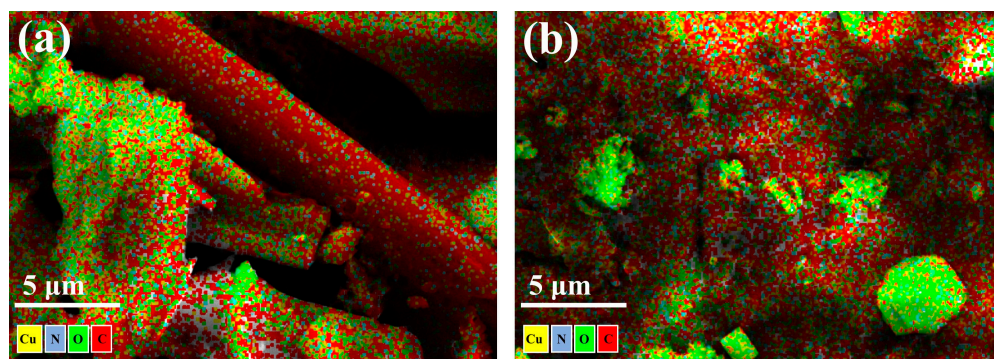

**Figure S3.** EDS layering images of Cu/C-BN-CC and Cu/C-BN-PT materials. (a). Cu/C-BN-CC material. (b). Cu/C-BN-PT.

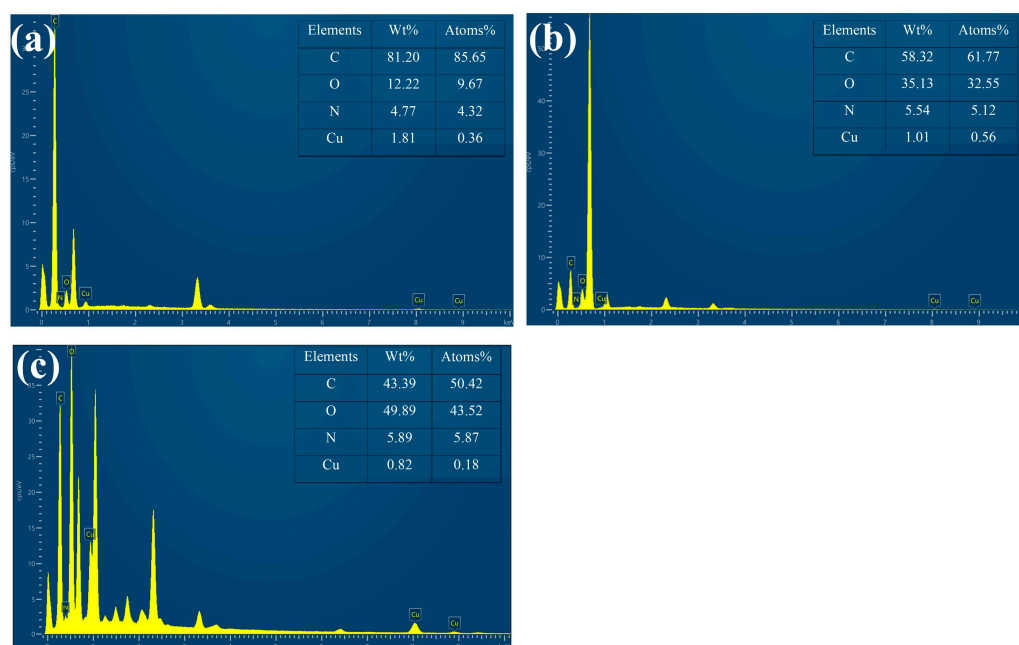

**Figure S4.** Total number of elemental distribution maps for Cu/C-BN, Cu/C-BN-CC, and Cu/C-BN-PT materials. (a). Cu/C-BN-CC. (b). Cu/C-BN-PT. (c). Cu/C-BN.

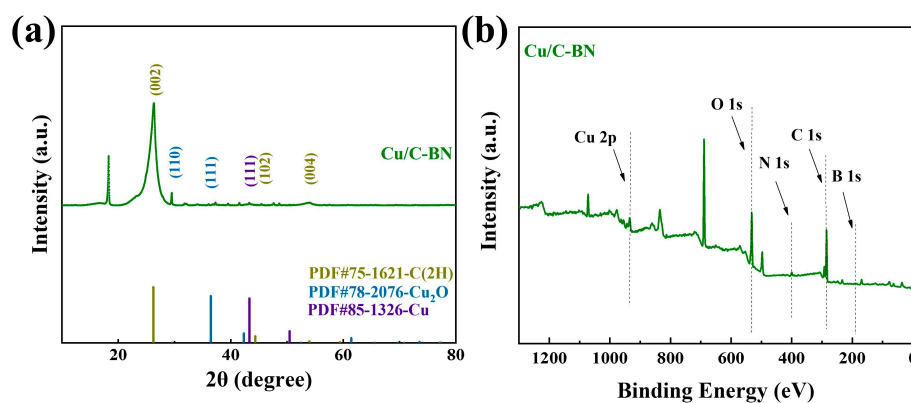

Figure S5. XRD and XPS images of Cu/C-BN materials. (a). XRD. (b). XPS.

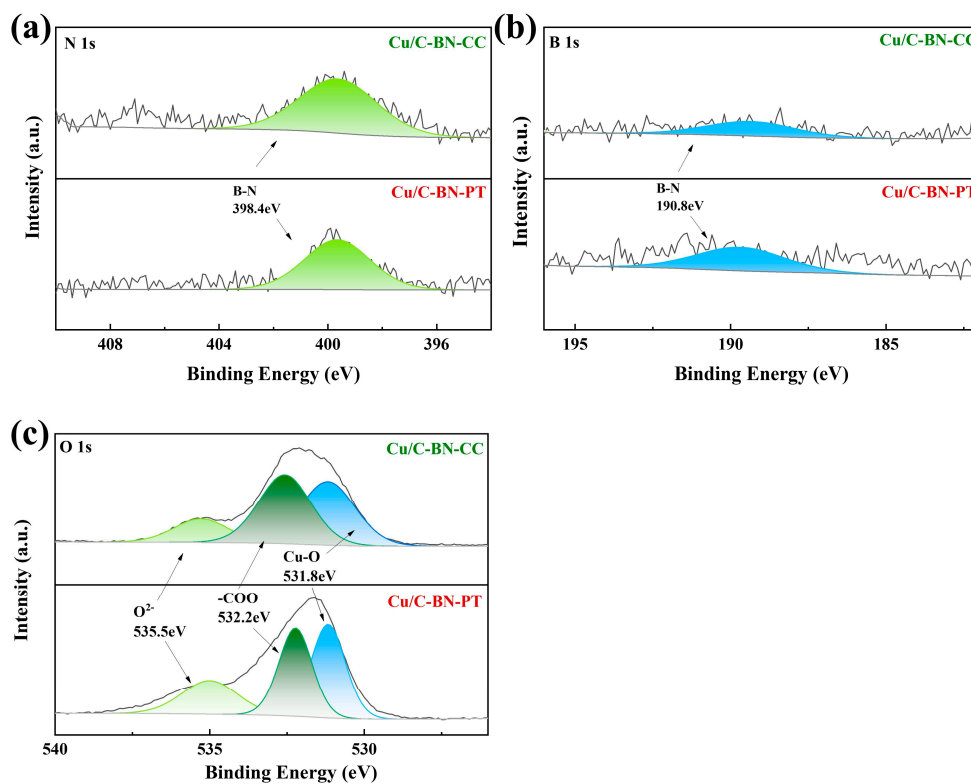

Figure S6. Cu/C-BN-CC and Cu/C-BN-PT materials N 1s(a), B 1s(b), O 1s(c) XPS fine spectrum.

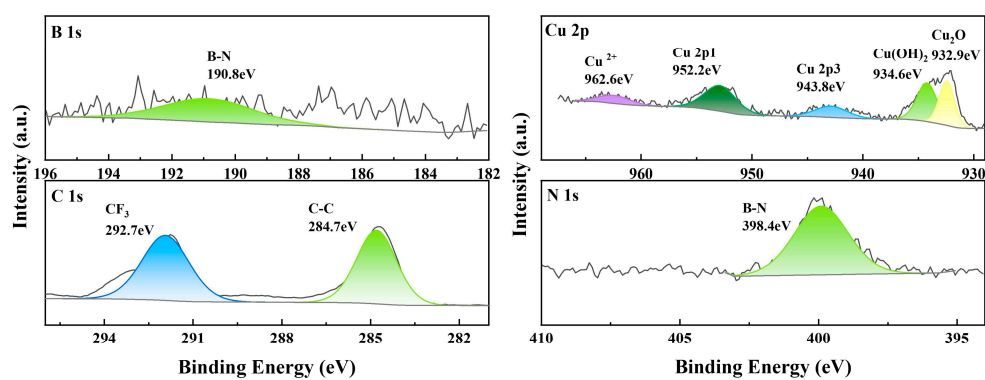

Figure S7. Cu/C-BN material B 1s, C 1s, Cu 2p, N 1s XPS fine spectrum.

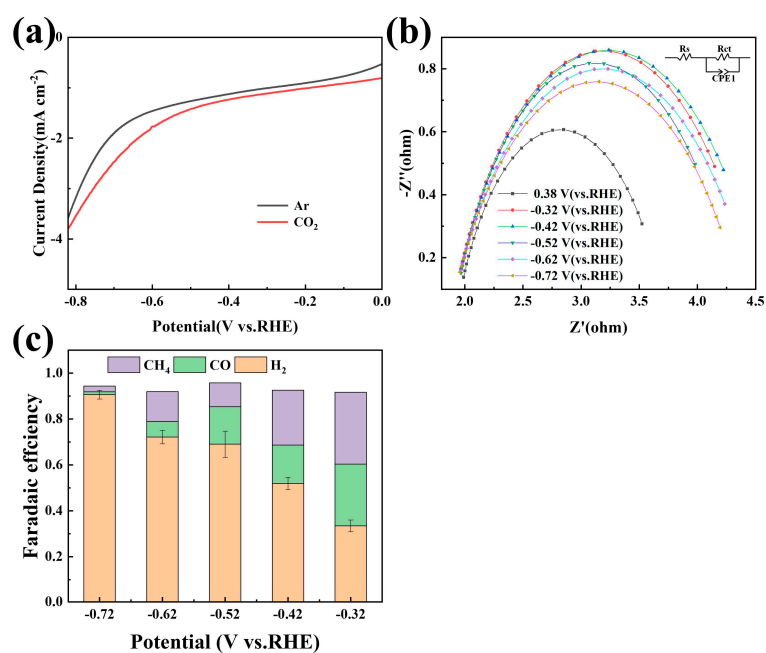

**Figure S8.** (a) LSV diagram of Cu/C-BN material in 0.2 M Na<sub>2</sub>SO<sub>4</sub> solution. (b). Impedance diagram of Cu/C-BN in 1 M KHCO<sub>3</sub> solution. (c). Product diagram of Cu/C-BN in 1 M KHCO<sub>3</sub> solution.

**Table S1.** EIS fitting data of Cu/C-BN material in 1.0 M KHCO<sub>3</sub> solution

| Potential | Rs   | RCT  | CPE-T   | CPE-P |
|-----------|------|------|---------|-------|
| 0.38      | 1.92 | 1.8  | 0.00054 | 0.75  |
| -0.32     | 1.88 | 2.62 | 0.00065 | 0.74  |
| -0.42     | 1.88 | 2.7  | 0.00076 | 0.72  |
| -0.52     | 1.89 | 2.45 | 0.0006  | 0.75  |
| -0.62     | 1.87 | 2.64 | 0.0011  | 0.69  |
| -0.72     | 1.86 | 2.54 | 0.0012  | 0.69  |

**Table S2.** EIS fitting data of Cu/C-BN-CC material in 1.0 M KHCO<sub>3</sub> solution

| Potential | Rs   | RCT  | CPE-T  | CPE-P |
|-----------|------|------|--------|-------|
| 0.48      | 1.87 | 1.17 | 0.0023 | 0.71  |
| -0.32     | 1.75 | 3.24 | 0.0035 | 0.63  |
| -0.42     | 1.75 | 6.83 | 0.0020 | 0.68  |
| -0.52     | 1.79 | 4.60 | 0.0018 | 0.70  |
| -0.62     | 1.80 | 2.97 | 0.0019 | 0.70  |
| -0.72     | 1.77 | 2.21 | 0.0041 | 0.63  |

**Table S3.** EIS fitting data of Cu/C-BN-PT material in 1.0 M KHCO<sub>3</sub> solution

| Potential | Rs   | RCT   | CPE-T   | CPE-P |
|-----------|------|-------|---------|-------|
| 0.38      | 2.17 | 155.2 | 0.00061 | 0.81  |
| -0.32     | 2.28 | 337.8 | 0.00056 | 0.86  |
| -0.42     | 2.30 | 75.27 | 0.00060 | 0.85  |
| -0.52     | 2.30 | 19.30 | 0.00066 | 0.84  |
| -0.62     | 2.32 | 6.41  | 0.00068 | 0.84  |
| -0.72     | 2.31 | 3.18  | 0.00068 | 0.84  |

**Table S4.** Product efficiency of Cu/C-BN material at different potentials in 1.0 M KHCO<sub>3</sub> solution

| Potential | FE (H <sub>2</sub> ) | FE (CO) | FE (CH <sub>4</sub> ) |
|-----------|----------------------|---------|-----------------------|
| -0.72     | 90.65%               | 1.29%   | 2.40%                 |
| -0.62     | 72.19%               | 6.84%   | 12.93%                |
| -0.52     | 69.04%               | 16.31%  | 10.46%                |
| -0.42     | 51.94%               | 16.68%  | 23.94%                |
| -0.32     | 33.51%               | 26.91%  | 31.26%                |

**Table S5.** Product efficiency of Cu/C-BN-CC material at different potentials in 1.0 M KHCO<sub>3</sub> solution

| Potential | FE (H <sub>2</sub> ) | FE (CO) | FE (CH <sub>4</sub> ) |
|-----------|----------------------|---------|-----------------------|
| -0.72     | 89.78%               | 1.36%   | 2.13%                 |
| -0.62     | 74.73%               | 7.54%   | 10.51%                |
| -0.52     | 70.26%               | 16.60%  | 9.75%                 |
| -0.42     | 50.62%               | 17.65%  | 21.50%                |
| -0.32     | 24.92%               | 30.32%  | 30.45%                |

**Table S6.** Product efficiency of Cu/C-BN-PT material at different potentials in 1.0 M KHCO<sub>3</sub> solution

| Potential | FE (H <sub>2</sub> ) | FE (CO) | FE (CH <sub>4</sub> ) |
|-----------|----------------------|---------|-----------------------|
| -0.72     | 89.91%               | 5.48%   | 0.07%                 |
| -0.62     | 75.59%               | 12.09%  | 2.11%                 |
| -0.52     | 68.54%               | 15.19%  | 11.75%                |
| -0.42     | 41.30%               | 28.20%  | 19.31%                |
| -0.32     | 12.38%               | 47.70%  | 28.45%                |

**Table S7.** EIS fitting data of Cu/C-BN material in 90% PC (10% H<sub>2</sub>O) solution

| Potential | R <sub>s</sub> | RCT   | CPE-T | CPE-P |
|-----------|----------------|-------|-------|-------|
| -0.16     | 13.71          | 48.41 | 0.013 | 0.47  |
| -0.76     | 13.75          | 144.2 | 0.014 | 0.48  |
| -0.96     | 14.07          | 41.20 | 0.012 | 0.52  |
| -1.16     | 14.20          | 14.45 | 0.011 | 0.54  |
| -1.36     | 14.25          | 8.47  | 0.009 | 0.57  |
| -1.56     | 14.29          | 5.37  | 0.008 | 0.59  |

**Table S8.** Product efficiency of Cu/C-BN material at different potentials in 90% PC (10% H<sub>2</sub>O) solution

| Potential | FE (H <sub>2</sub> ) | FE (CO) | FE (CH <sub>4</sub> ) |
|-----------|----------------------|---------|-----------------------|
| -1.56     | 49.05%               | 23.66%  | 13.10%                |
| -1.36     | 55.12%               | 21.32%  | 10.06%                |
| -1.16     | 48.54%               | 44.34%  | 11.78%                |
| -0.96     | 24.80%               | 63.31%  | 15.27%                |
| -0.76     | 17.24%               | 64.70%  | 12.00%                |
